# Natural selection and the advantage of recombination

Philip J Gerrish<sup>1,2,3,\*</sup>, Benjamin Galeota-Sprung<sup>4</sup>, Fernando Cordero<sup>5</sup>, Paul Sniegowski<sup>4</sup>, Alexandre Colato<sup>6</sup>, Nicholas Hengartner<sup>2</sup>, Varum Vejalla<sup>7</sup>, Julien Chevallier<sup>8</sup> & Bernard Ycart<sup>8</sup>

<sup>1</sup>*Department of Biology, University of New Mexico, Albuquerque, New Mexico, USA*

<sup>2</sup>*Theoretical Biology & Biophysics, Los Alamos National Lab, Los Alamos, New Mexico, USA*

<sup>3</sup>*Instituto de Ciencias Biomédicas, Universidad Autónoma de Ciudad Juárez, México,*

<sup>4</sup>*Department of Biology, University of Pennsylvania, Philadelphia, Pennsylvania, USA*

<sup>5</sup>*Mathematics Department, Bielefeld University, Bielefeld, Germany*

<sup>6</sup>*Ciências da Natureza, Matemática e Educação, Univ Fed de São Carlos, Araras SP, Brazil*

<sup>7</sup>*Thomas Jefferson High School for Science and Technology, Alexandria, Virginia, USA*

<sup>8</sup>*Mathématique Appliquée, Laboratoire Jean Kuntzmann, Université Grenoble Alpes, France*

**Exchanging genetic material with another individual seems risky from an evolutionary standpoint, and yet living things across all scales and phyla do so quite regularly. The pervasiveness of such genetic exchange, or recombination, in nature has defied explanation since the time of Darwin<sup>1-4</sup>. Conditions that favor recombination, however, are well-understood: recombination is advantageous when the genomes of individuals in a population contain more selectively mismatched combinations of alleles than can be explained by chance alone. Recombination remedies this imbalance by shuffling alleles across individuals. The great difficulty in explaining the ubiquity of recombination in nature lies in identifying a source of this imbalance that is comparably ubiquitous. Intuitively, it would seem that natural selection should reduce the imbalance by favoring selectively matched combinations of high-fitness alleles. We show, however, that this widely-held intuition is wrong; to the contrary, we find that natural selection has an encompassing tendency to assemble selectively mismatched combinations of alleles, thereby increasing the imbalance and promoting the evolution of recombination across demes in a structured population. We further show that, on average, selection-driven changes in allele frequencies over time within a single evolving population generate a net imbalance that promotes recombination, and additive fitness effects drive this imbalance. Our findings provide a novel theoretical point of departure from which the enormous body of established work on the evolution of sex and recombination may be viewed anew. They further suggest that recombination evolved and is maintained more as a byproduct of natural selection than as a catalyst.**

The ability to exchange genetic material through recombination (and sex) is a heritable trait<sup>5,6</sup> that is influenced by many different evolutionary and ecological factors, both direct and indirect, both positive and negative. Evidence from nature clearly indicates that the net effect of these factors must be positive: recombination across all levels of organismal size and complexity is undeniably the rule rather than the exception<sup>2-4,7</sup>. Theoretical studies, on the other hand, have revealed a variety of different mechanisms and circumstances that can promote the evolution of recombination, but each one by itself is of limited scope<sup>2,4,8</sup>. These studies would thus predict that the absence of recombination is the rule and its presence an exception. The sheer abundance of these exceptions, however, can be seen as amounting to a rule in its own right – a “pluralist” view that has been adopted by some authors to explain the ubiquity of recombination<sup>3,7,9</sup>. The necessity of this pluralist view, however, may be seen as pointing toward a fundamental shortcoming in existing theory: perhaps some very general factor that would favor recombination has been missing<sup>3,4,8,10</sup>.

Existing theories of the evolution and maintenance of sex and recombination can be divided into those that invoke *direct* vs *indirect* selection on recombination. Theories invoking direct selection propose that recombination evolved and is maintained by some physiological effect that mechanisms of recombination themselves have on survival or on replication efficiency. Such theories might speak to the origins of sex and recombination but they falter when applied to their maintenance<sup>1</sup>. Most theories invoke indirect selection: they assume that any direct or immediate effect of recombination mechanisms is small compared to the trans-generational consequences of recombination.

While differing on the causal factors involved, established theoretical approaches that invoke indirect selection are unanimous in their identification of the fundamental selective environment required for sex and recombination to evolve: a population must harbor an excess of selectively mismatched combinations of alleles across loci and a deficit of selectively matched combinations. Recombination is favoured under these conditions because on average it breaks up the mismatched combinations and assembles matched combinations. Assembling selectively matched combinations increases the efficiency of natural selection: putting high-fitness alleles together can expedite their fixation<sup>11–15</sup>, and putting low-fitness alleles together can expedite their elimination<sup>16,17</sup>. This fact was recognized by foundational figures of population genetics<sup>18,19</sup>, who surmised that a competition among populations should favor the evolution of recombination. A later study showed that such across-population competition was not necessary and that, under restrictive conditions, competition among recombination-rate variants (at a *modifier* locus) within the same population can favor the evolution of recombination<sup>20</sup>. A common feature of these two approaches is an underlying and intuitive assumption that recombinants themselves are not on average immediately advantageous, and that several generations would be necessary for the advantage of recombination to be realized.

In what follows, we question this underlying assumption by examining the effects of natural selection on the immediate advantage or disadvantage of recombination. We begin by reducing the problem to what we believe is its most essential form: we ask how the selective value of haploid recombinants is affected when natural selection simply acts on standing heritable variation. We ask this question for two common scenarios: 1) when parents of recombinant offspring come from

different populations or from different demes in a structured metapopulation, and 2) when parents come from within the same unstructured population. Respectively, we find that in the long run, the net selective advantage of recombinants is non-negative: 1) after one or more fixations, and 2) unconditionally.

We preface our developments with an essential technical point. In much of the relevant literature, the measure of selective mismatch across loci affecting the evolution of recombination is linkage disequilibrium (LD)<sup>8,12,13,21–23</sup>, which measures bias in allelic frequencies across loci but does not retain information about the selective value of those alleles. Here, the objectives of our study require a slight departure from tradition: our measure of selective mismatch will be covariance between genic fitnesses. This departure is necessary because covariance retains information about both the frequencies and selective value of alleles, and it is convenient because the mean selective advantage accrued by recombinants over the course of a single generation is equal to minus the covariance (Methods and Fig S3). Our results will thus be given in terms of covariance and we recall: negative covariance, like negative LD, means positive selection for recombinants.

To present our findings, it suffices to consider a non-recombining haploid organism whose genome consists of just two fitness-related loci labeled  $x$  and  $y$ . Genetically-encoded phenotypes at these two loci are quantified by random variables  $X$  and  $Y$ , both of which are positively correlated with fitness. These organisms exist in a large population in which some of the individuals carry phenotype  $(X_1, Y_1)$  and have fitness  $Z_1 = \phi(X_1, Y_1)$  and the rest carry phenotype  $(X_2, Y_2)$  and

have fitness  $Z_2 = \phi(X_2, Y_2)$ . We note that, in the absence of epistasis or dominance, the scenario we describe is formally equivalent to considering a diploid organism whose genome consists of one locus and two alleles available to each haploid copy. The question we ask is this: Does the action of natural selection, by itself, affect associations between  $X$  and  $Y$ , and if so, how? Figure 1 illustrates the problem by analogy to a canoe race. Figure 2 shows how the problem is posed analytically.

On the surface, one might suspect that natural selection would promote well-matched combinations in which large values of  $X$  are linked to large values of  $Y$ , thereby creating a positive association between  $X$  and  $Y$ . In fact, this notion is so intuitive that it is considered self-evident, explicitly or implicitly, in much of the literature<sup>1-3,7,9,14,24,25</sup>. If this notion were true, recombination would break up good allelic combinations, on average, and should thus be selectively suppressed. Such allele shuffling has been called “genome dilution”, a label that betrays its assumed costliness. We find, however, that the foregoing intuition is wrong. To the contrary, we find that natural selection will, on average, promote an excess of mismatched combinations in which large values of  $X$  are linked to small values of  $Y$ , or vice versa, thereby creating a negative association between  $X$  and  $Y$ . Recombination will on average break up the mismatched combinations created by natural selection, assemble well-matched combinations, and should thus be favoured.

Figure 3 illustrates why our initial intuition was wrong and why natural selection instead tends to create negative fitness associations among genes. For simplicity of presentation, we assume here that an individual’s fitness is  $Z = \phi(X, Y) = X + Y$ , i.e., that  $X$  and  $Y$  are simply

additive genic fitness contributions, and that  $X$  and  $Y$  are independent. (In the Methods, SI, and Fig 4, we relax these assumption and show that our qualitative results are true quite generally.) In the absence of recombination, selection does not act independently on  $X$  and  $Y$  but on their sum,  $Z = X + Y$ . Perhaps counter-intuitively, this fact alone creates negative associations. To illustrate, we suppose that we know the fitness of successful genotypes to be some constant,  $z$ , such that  $X + Y = z$ ; here, we have the situation illustrated in Fig 3a and we see that  $X$  and  $Y$  are negatively associated; indeed, covariance is immediate:  $\sigma_{XY} = -\sigma_X\sigma_Y \leq 0$ . Of course, in reality the fitnesses of successful genotypes will not be known *a priori* nor will they be equal to a constant; instead, they will follow a distribution of maxima of  $Z$  as illustrated in Fig 3b. If populations consist of  $n$  contending individuals, then  $X_{(n)} + Y_{(n)} = Z^{[n]}$ , the  $n^{\text{th}}$  order statistic of  $Z$  with genic components  $X_{(n)}$  and  $Y_{(n)}$  (called *concomitants* in the probability literature<sup>26</sup>). In general,  $Z^{[n]}$  will have smaller variance than  $Z$ . Components  $X_{(n)}$  and  $Y_{(n)}$ , therefore, while not exactly following a line as in Fig 3a, will instead be constrained to a comparatively narrow distribution about that straight line, illustrated by Fig 3b, thereby creating a negative association. Figure 3c plots ten thousand simulated populations evolving from their initial (green dots) to final (black dots) mean fitness components; this panel confirms the predicted negative association. We note that if  $X$  and  $Y$  initially have strongly positive covariance as in Fig 4, more than one bout of selection (more than one fixation) may be required to drive covariance to negative values.

What we have shown so far is that, if evolutionary “winners” – taken from different populations, subpopulations, demes or clones within a structured population – were to shuffle their genomes through recombination, the resulting offspring should be more fit than their parents, on

average. This effect provides novel evolutionary insight into established observations that population structure can favor recombination<sup>27–31</sup> and may even speak to notions that out-crossing can create hybrid vigour (heterosis).

Much of evolution indeed takes place in structured meta-populations; it is thought, for example, that primordial life forms evolved primarily on surfaces that provided spatial structure<sup>32,33</sup>. It is also true, however, that much of evolution takes place within unstructured (or “well-mixed”) populations; primitive life forms, for example, also existed in planktonic form<sup>34</sup>. We now turn to the question of how evolution by natural selection affects the selective value of recombinants in such unstructured populations.

To this end, we again reduce the problem to what we believe is its most essential form: our setting is again a haploid population with standing heritable variation and no mutation. We again ask how the selective value of potential recombinants is affected when natural selection simply acts on the standing variation. But now our focus is on recombinants formed from two randomly-chosen parents within the same unstructured population. To determine the selective value of such recombinants, we ask whether the average covariance over the long run is positive or negative; to this end, we integrate the covariance over the time required for natural selection to eliminate the population’s heritable variation. This time-integrated covariance will be positive if natural selection creates conditions that oppose recombination on average; it will be negative if those conditions favour recombination.

In the Methods, we show that average covariance over the long run is unconditionally non-

positive:  $\int_0^\infty \sigma_{XY}(t)dt \leq 0$ . Remarkably, this finding requires no assumptions about the distribution of  $X$  and  $Y$ ; in fact, a smooth density is not required. Indeed, this distribution can have strongly positive covariance, and yet the net effect of natural selection is still to create negative time-integrated covariance (Fig 4). Employing a combined analytical/numerical approach (SI), we confirm that time-integrated covariance is indeed negative under a wide range of different distributions for  $X$  and  $Y$  and becomes increasingly negative as the number of alleles increases.

We further show that it is primarily the additive component of fitness that causes time-integrated covariance to be negative. This fact stands in contrast with previous notions that non-additive effects, specifically negative or fluctuating epistasis, are an essential ingredient in the evolution of recombination<sup>21,23,35–38</sup>. Introducing a non-additive epistatic parameter  $\kappa$  to the fitness function  $\phi$ , we find there exists  $\epsilon$  (which will depend on  $\phi$ ) such that when  $\kappa \in (-\epsilon, \epsilon)$ , time-integrated covariance is always non-positive. Some recent work<sup>39–41</sup> suggests that if recombination is introduced above a critical rate, the epistatic component becomes unimportant and the selective value of recombinants depends only on the additive component ( $\kappa = 0$ ), thus insuring recombinant advantage.

Our mathematical analyses of across- and within-population covariance by themselves tell us something fundamental about evolution: selection pressure for recombination is an unavoidable consequence of natural selection. These results, however, derive from somewhat non-traditional approaches and abstract math. To put our findings in perhaps a more familiar and tangible setting, we simulated the evolution of a structured metapopulation (with no migration). To avoid introduc-



ing the complexities of mutation, which will be addressed in a subsequent study, we here simply add uncorrelated gaussian noise to  $X$  and  $Y$  every one hundred generations so that the population undergoes repeated bouts of selection. Figure 4 plots covariance and correlation dynamics from these simulations. The theory we have developed here (and in the SI for the case of many alleles) makes quantitative and qualitative predictions about the change in both across- and within-deme covariance over the course of each bout of selection. As our theory predicts, 1) within-deme covariance immediately plunges below zero despite starting out very strongly positive, and 2) across-deme covariance is reduced in the first bout of selection but does not immediately go below zero; it is not until the third bout of selection that it dips below zero. (We note that within-deme *correlation* does not go below zero in the first bout of selection, but this is due to an averaging problem introduced by indeterminate correlations when covariance is near zero.)

Some authors<sup>2,42</sup> have argued that negative associations build up within a population because positive associations, in which alleles at different loci are selectively matched, are either removed efficiently (when they are both similarly deleterious), or fixed efficiently (when they are both similarly beneficial), thereby contributing little to overall within-population associations. Genotypes that are selectively mismatched, on the other hand, have longer sojourn times, as the less-fit loci effectively shield linked higher-fitness loci from selection. The net effect, it is argued, should be that alleles across loci will on average be selectively mismatched within a population. Our findings differ from these arguments in one respect, namely, we find that even genotypes that are ultimately fixed carry selectively mismatched alleles. In another respect, however, these arguments are entirely consistent with our findings: Equation (1) in Proposition 6 gives time-integrated covariance;

it is intuitively more likely that the numerator of that equation will be negative when the denominator is small, i.e., when  $Z_1$  and  $Z_2$  are close to each other. Negative values are thus amplified because they tend to occur when total fitness of the two genotypes are close to each other and thus coexist for a longer period of time before one displaces the other. Indeed this is the intuitive way to understand Proposition 7.

We have identified a phenomenon that is an inherent consequence of natural selection and gives rise to the fixation of selectively mismatched combinations of alleles across loci (or across allelic pairs in diploids). Generally speaking, this pervasive phenomenon is an example of counter-intuitive effects caused by probabilistic conditioning. For example, “Berkson’s bias”<sup>43,44</sup> arises when a biased observational procedure produces spurious negative correlations. In the original context, among those admitted to hospital due to illness, a negative correlation among potentially causative factors was observed but only because those with no illness (who tended to have no causative factors) were not admitted to the hospital and hence not observed. Similarly, negative correlations arise across genic fitnesses in part because genotypes in which both loci have low genic fitness are purged by selection. A key distinction between the phenomenon we describe and Berkson’s bias is that the absence of low-fitness genotypes is not an observational bias but an actual bias, as these genotypes no longer exist in the population.

As mentioned in the abstract, what we have presented here is a theoretical point of departure. Several relevant issues are beyond the scope of this first study: 1) We have said nothing about the magnitude of selection for recombinants. Our deterministic approach implicitly assumes an infi-

nite population in which any selective advantage, however minute, can be effective. In real (finite) populations, of course, this is not true. 2) Our approach implicitly assumes that recombination will evolve because persistent recombinant advantage will indirectly select for an increased recombination rate, but we have not explicitly shown this. In simulations (SI), we show that our reductionist approach with no mutation does indeed cause recombination modifiers to increase in frequency. 3) We have not incorporated mutation.

Many previous studies, in one way or another, point to the increase in agility and efficiency of adaptation that recombination confers as the primary cause of its evolution. Here, we invert the perspective of those earlier studies, asking not whether recombination speeds adaptation, but whether adaptation via natural selection generally creates selective conditions that make recombinants directly and immediately advantageous. If so, as our findings indicate, then: 1) the ubiquity of recombination in nature might be less enigmatic than previously thought, and 2) perhaps recombination arose and is maintained more as a byproduct than as a catalyst of natural selection.

## Methods

**Notes.** In the main text, we employ the shorthand  $\sigma_{XY}$  to denote covariance. In what follows, however, we use  $\sigma_{XY}$  and  $\text{Cov}(X, Y)$  (for clarity) interchangeably. Several of the proofs here are abridged; full proofs are in the SI, as well as alternative and supplemental proofs.

**Covariance and recombinant advantage.** Much work on the evolution of recombination employs linkage disequilibrium (LD) as the measure of selective imbalance either favoring (negative

LD) or opposing (positive LD) recombination. It is straight-forward to estimate LD from genomic sequence data, which likely explains the popularity of this measure. LD, however, contains no information about the selective cost of linkage. Covariance, on the other hand, retains all of the information regarding both the prevalence of linkage and its selective cost (i.e., recombinant advantage), and is thus the measure we employ. We note that when the fitness function is a bivariate Bernoulli distribution ( $\phi(X, Y) = \mathbb{P}\{X = i, Y = j\} = p_{i,j}$ ,  $i, j \in \{0, 1\}$ ) then covariance and disequilibrium are equivalent ( $p_{1,1} - p_{1,\bullet}p_{\bullet,1}$ ). Recombinants are formed from two randomly-chosen contemporaneous parents such that their genetic makeup is simply an unbiased random sampling of the pool of available alleles at the  $x$  and  $y$  loci. As such, their instantaneous advantage is zero on average:  $\mathbb{E}_R[X + Y] - \mathbb{E}[X + Y] = 0$ , where subscript  $R$  denotes recombinant and no subscript denotes wildtype. Recombinants and wildtype, however, gain fitness at different rates:  $\partial_t \mathbb{E}_R[X + Y] = \sigma_X^2 + \sigma_Y^2$  and  $\partial_t \mathbb{E}[X + Y] = \sigma_X^2 + \sigma_Y^2 + 2\sigma_{XY}$ . A first order expansion thus reveals that the selective advantage of recombinants after a single generation of growth is  $\partial_t \mathbb{E}_R[X + Y] - \partial_t \mathbb{E}[X + Y] = -2\sigma_{XY}$ ; a single-generation Moran model (Fig S3) shows covariance increases linearly in the first generation, implying that the mean selective advantage of recombinants over that first generation is  $-\sigma_{XY}$ . A full treatment of the relation between covariance and recombinant advantage is found in the SI, as well as the relation between our approach and classical population genetics.

**Two loci, two alleles: across populations or demes.** The general setting for the two-loci two-alleles case is laid out in the main text and in Fig 2. Here, we provide mathematical foundation for our across-deme findings. No hypothesis on the fitness function  $\phi$  is made at this point, apart from

being measurable. For the sake compact presentation we assume here that  $(X_1, Y_1, X_2, Y_2)$  are i.i.d.; departures from this and other simplifying assumptions are dealt with in the SI. As defined in Fig 2,  $Z_i = \phi(X_i, Y_i)$ ,  $Z^{[i]} = \phi(X_{(i)}, Y_{(i)})$ , and  $Z^{[2]} > Z^{[1]}$ .

**PROPOSITION 1.** *Let  $\psi$  be any measurable function from  $\mathbb{R}^2$  into  $\mathbb{R}$ . Then:  $\frac{1}{2}\mathbb{E}(\psi(X_{(1)}, Y_{(1)})) + \frac{1}{2}\mathbb{E}(\psi(X_{(2)}, Y_{(2)})) = \mathbb{E}(\psi(X_1, Y_1))$ . In particular, the arithmetic mean of  $\mathbb{E}(X_{(1)})$  and  $\mathbb{E}(X_{(2)})$  is  $\mathbb{E}(X_1)$ .*

**PROOF:** Consider a random index  $I \in \{1, 2\}$ , and for now  $\mathbb{P}(I = 1) = \mathbb{P}(I = 2) = 1/2$ , and  $I$  is independent of  $(X_1, Y_1, X_2, Y_2)$ . The couple  $(X_I, Y_I)$  is distributed as  $(X_1, Y_1)$ . Hence,  $\mathbb{E}(\psi(X_I, Y_I)) = \mathbb{E}(\psi(X_1, Y_1))$ , however,  $\mathbb{E}(\psi(X_I, Y_I)) = \mathbb{E}(\mathbb{E}(\psi(X_I, Y_I) | I)) = \frac{1}{2}\mathbb{E}(\psi(X_{(1)}, Y_{(1)})) + \frac{1}{2}\mathbb{E}(\psi(X_{(2)}, Y_{(2)}))$ .  $\square$

**PROPOSITION 2.** *We have:  $\text{Cov}(X_{(1)}, Y_{(1)}) + \text{Cov}(X_{(2)}, Y_{(2)}) = -(\text{Cov}(X_{(1)}, Y_{(2)}) + \text{Cov}(X_{(2)}, Y_{(1)})) = -\frac{1}{2}\mathbb{E}(X_{(2)} - X_{(1)})\mathbb{E}(Y_{(2)} - Y_{(1)})$ .*

**PROOF:** The couples  $(X_{(I)}, Y_{(I)})$  and  $(X_{(I)}, Y_{(3-I)})$  are both distributed as  $(X_1, Y_1)$ . Therefore their covariances are null. These covariances can also be computed by conditioning on  $I$  (see e.g. formula (1.1) in <sup>45</sup>). For  $(X_{(I)}, Y_{(I)})$  we have:  $\text{Cov}(X_{(I)}, Y_{(I)}) = \mathbb{E}(\text{Cov}(X_{(I)}, Y_{(I)} | I)) + \text{Cov}(\mathbb{E}(X_{(I)} | I), \mathbb{E}(Y_{(I)} | I))$ . On the right-hand side, the first term is:  $\mathbb{E}(\text{Cov}(X_I, Y_I | I)) = \frac{1}{2}\text{Cov}(X_{(1)}, Y_{(1)}) + \frac{1}{2}\text{Cov}(X_{(2)}, Y_{(2)})$ . The second term is:  $\text{Cov}(\mathbb{E}(X_I | I), \mathbb{E}(Y_I | I)) = \frac{1}{4}\mathbb{E}(X_{(2)} - X_{(1)})\mathbb{E}(Y_{(2)} - Y_{(1)})$ . Similarly, we have:  $\text{Cov}(X_{(I)}, Y_{(3-I)}) = \mathbb{E}(\text{Cov}(X_{(I)}, Y_{(3-I)} | I)) + \text{Cov}(\mathbb{E}(X_{(I)} | I), \mathbb{E}(Y_{(3-I)} | I))$ . The first term in the right-hand side is:  $\mathbb{E}(\text{Cov}(X_{(I)}, Y_{(3-I)} | I)) = \frac{1}{2}\text{Cov}(X_{(1)}, Y_{(2)}) + \frac{1}{2}\text{Cov}(X_{(2)}, Y_{(1)})$ . The second term in the right-hand side is:  $\text{Cov}(\mathbb{E}(X_{(I)} | I), \mathbb{E}(Y_{(3-I)} | I)) = -\frac{1}{4}\mathbb{E}(X_{(2)} - X_{(1)})\mathbb{E}(Y_{(2)} - Y_{(1)})$ . Hence the result.

□

**PROPOSITION 3.** *Assume that the fitness function  $\phi$  is symmetric:  $\phi(x, y) = \phi(y, x)$ . Then the couple  $(X_{(1)}, Y_{(2)})$  has the same distribution as the couple  $(Y_{(1)}, X_{(2)})$ .*

As a consequence,  $X_{(1)}$  and  $Y_{(1)}$  have the same distribution, so do  $X_{(2)}$  and  $Y_{(2)}$ . Thus:  $\mathbb{E}(X_{(2)} - X_{(1)}) = \mathbb{E}(Y_{(2)} - Y_{(1)}) = \frac{1}{2}\mathbb{E}(Z^{[2]} - Z^{[1]})$ . Another consequence is that:  $\text{Cov}(X_{(1)}, Y_{(2)}) = \text{Cov}(X_{(2)}, Y_{(1)})$ . Thus by Proposition 2:  $\text{Cov}(X_{(1)}, Y_{(2)}) = \text{Cov}(X_{(2)}, Y_{(1)}) = \frac{1}{16}\mathbb{E}^2(Z^{[2]} - Z^{[1]})$ .

**PROOF:** Since  $\phi$  is symmetric, the change of variable  $(X_1, Y_1, X_2, Y_2) \mapsto (Y_1, X_1, Y_2, X_2)$  leaves unchanged the couple  $(Z_1, Z_2)$ . □

**PROPOSITION 4.** *Assume that the ranking function  $\phi$  is the sum:  $\phi(x, y) = x + y$ . Then:  $\mathbb{E}(X_{(1)}) = \mathbb{E}(Y_{(1)})$ ,  $\mathbb{E}(X_{(2)}) = \mathbb{E}(Y_{(2)})$ , and  $\mathbb{E}(X_{(1)}) < \mathbb{E}(X_{(2)})$ .*

**PROOF:** The first two equalities come from Proposition 3. By definition,  $\mathbb{E}(X_{(1)} + Y_{(1)}) < \mathbb{E}(X_{(2)} + Y_{(2)})$ . Hence the inequality. □

**PROPOSITION 5.** *Assume that the ranking function  $\phi$  is the sum, and that the common distribution of  $X_1, Y_1, X_2, Y_2$  is symmetric: there exists  $a$  such that  $f(x - a) = f(a - x)$ . Then  $(a - X_{(1)}, a - Y_{(1)})$  has the same distribution as  $(X_{(2)} - a, Y_{(2)} - a)$ . As a consequence,  $\text{Cov}(X_{(1)}, Y_{(1)}) = \text{Cov}(X_{(2)}, Y_{(2)})$ .*

**PROOF:** The change of variable  $(X_1, Y_1, X_2, Y_2) \mapsto (2a - X_1, 2a - Y_1, 2a - X_2, 2a - Y_2)$  leaves the distribution unchanged. It only swaps the indices  $i$  and  $s$  of minimal and maximal sum. □

If we summarize Propositions 1, 2, 3, 4, 5 for the case where the ranking function is the sum, and the distribution is symmetric, one gets:

$$\begin{aligned} \text{Cov}(X_{(1)}, Y_{(1)}) &= \text{Cov}(X_{(2)}, Y_{(2)}) < 0 \\ \text{Cov}(X_{(1)}, Y_{(2)}) &= \text{Cov}(X_{(2)}, Y_{(1)}) > 0 \\ |\text{Cov}(X_{(1)}, Y_{(1)})| &= \text{Cov}(X_{(1)}, Y_{(2)}) = \frac{1}{16} \mathbb{E}^2(Z^{[2]} - Z^{[1]}) . \end{aligned}$$

**Two loci, two alleles: over time within the same population.** We note that proofs in this section are abridged, and that full proofs and alternative proofs are given in the SI.

PROPOSITION 6. *Within-population covariance integrated over time is:*

$$\int_0^\infty \sigma_{XY}(t) dt = q \mathbb{E} \left[ \frac{(X_2 - X_1)(Y_2 - Y_1)}{|Z_2 - Z_1|} \right] \quad (1)$$

where  $q$  is the initial frequency of the inferior genotype. No assumption about the distribution of  $(X, Y)$  is required. And  $Z_i = \phi(X_i, Y_i)$  where fitness function  $\phi$  can be any function.

PROOF: We let  $p$  denote initial frequency of the superior of the two genotypes, and we let  $q = 1 - p$  denote initial frequency of the inferior genotype. Time-integrated covariance is:

$$\int_0^\infty \sigma_{X,Y}(t) dt = \mathbb{E} \left[ (X_{(2)} - X_{(1)})(Y_{(2)} - Y_{(1)}) \int_0^\infty \frac{p q e^{(Z^{[1]} + Z^{[2]})t}}{(p e^{Z^{[2]}t} + q e^{Z^{[1]}t})^2} dt \right]$$

Integration by parts yields:

$$\int_0^\infty \sigma_{XY}(t) dt = q \mathbb{E} \left[ \frac{(X_{(2)} - X_{(1)})(Y_{(2)} - Y_{(1)})}{Z^{[2]} - Z^{[1]}} \right]$$

where  $q$  in Prop 6 is written as  $1 - p_0$ . We observe that:

$$(X_{(2)} - X_{(1)})(Y_{(2)} - Y_{(1)}) = (X_{(1)} - X_{(2)})(Y_{(1)} - Y_{(2)}) = (X_2 - X_1)(Y_2 - Y_1)$$

and that

$$Z^{[2]} - Z^{[1]} = |Z_2 - Z_1|$$

from which we have:

$$\mathbb{E}\left[\frac{(X_{(2)} - X_{(1)})(Y_{(2)} - Y_{(1)})}{Z^{[2]} - Z^{[1]}}\right] = \mathbb{E}\left[\frac{(X_2 - X_1)(Y_2 - Y_1)}{|Z_2 - Z_1|}\right]$$

□

**PROPOSITION 7.** *We define spacings  $\Delta X = X_2 - X_1$ ,  $\Delta Y = Y_2 - Y_1$ , and  $\Delta Z = Z_2 - Z_1 = \Delta X + \Delta Y$ . If the pairs  $(X_i, Y_i)$  are independently drawn from any distribution, then  $\Delta X$  and  $\Delta Y$  are symmetric about zero, and time-integrated covariance is unconditionally non-positive:*

$$\int_0^\infty \sigma_{X,Y}(t) dt = \mathbb{E}\left[\frac{\Delta X \Delta Y}{|\Delta Z|}\right] \leq 0$$

**PROOF:** There is no need to assume that  $(\Delta X, \Delta Y)$  has a density. This proof also reveals that the result also holds for discrete random variables. Let  $\Delta X, \Delta Y$  be two real-valued random variables such that:  $(-\Delta X, \Delta Y)$  has the same distribution as  $(\Delta X, \Delta Y)$ . We have:

$$\begin{aligned} \mathbb{E}[\Delta X \Delta Y / |\Delta X + \Delta Y|] &= \mathbb{E}[\mathbb{1}_{\Delta X \Delta Y > 0} \Delta X \Delta Y / |\Delta X + \Delta Y|] + \mathbb{E}[\mathbb{1}_{\Delta X \Delta Y < 0} \Delta X \Delta Y / |\Delta X + \Delta Y|] \\ &= \mathbb{E}[\mathbb{1}_{\Delta X \Delta Y > 0} \Delta X \Delta Y / |\Delta X + \Delta Y|] + \mathbb{E}[\mathbb{1}_{-\Delta X \Delta Y < 0} (-\Delta X) \Delta Y / |\Delta Y - \Delta X|] \\ &= \mathbb{E}[\mathbb{1}_{\Delta X \Delta Y > 0} \Delta X \Delta Y / |\Delta X + \Delta Y|] - \mathbb{E}[\mathbb{1}_{\Delta X \Delta Y > 0} \Delta X \Delta Y / |\Delta Y - \Delta X|] \\ &= \mathbb{E}[\mathbb{1}_{\Delta X \Delta Y > 0} \Delta X \Delta Y (1/|\Delta X + \Delta Y| - 1/|\Delta Y - \Delta X|)] \\ &\leq 0 \end{aligned}$$

When  $\Delta X$  and  $\Delta Y$  have the same sign as imposed by the indicator function in the last expectation, we have  $|\Delta X + \Delta Y| > |\Delta Y - \Delta X|$ , from which the inequality derives.

□



COROLLARY 1. *Proposition 7 holds for divergent expectations.*

PROOF: Set  $U = |\Delta X|$  and  $V = |\Delta Y|$ ;  $M = \text{Max}(U, V)$ ,  $m = \text{Min}(U, V)$ . Then you can rewrite the expectation as:

$$\begin{aligned} E[UV\{1/(U + V) - 1/(|U - V|)\}] &= E[mM\{-2m/(M^2 - m^2)\}] \\ &= -2E[Mm^2/(M^2 - m^2)] \leq 0 \end{aligned}$$

Indeed, if the expectation is divergent, then it is always  $-\infty$ . This approach removes the need to make the argument that  $U + V > |U - V|$  and avoids the need to take a difference of expectations.

An alternative approach is given in an expanded statement and proof of Proposition 7 in the SI.  $\square$

1. de Visser, J. A. G. M. & Elena, S. F. The evolution of sex: empirical insights into the roles of epistasis and drift. *Nat. Rev. Genet.* **8**, 139–149 .
2. Otto, S. P. The evolutionary enigma of sex. *Am. Nat.* **174 Suppl 1**, S1–S14 .
3. Otto, S. P. & Lenormand, T. Resolving the paradox of sex and recombination. *Nat. Rev. Genet.* **3**, 252–261 .
4. Barton, N. H. & Charlesworth, B. Why sex and recombination? *Science* **281**, 1986–1990 .
5. Bodmer, W. F. & Parsons, P. A. Linkage and recombination in evolution. In Caspari, E. W. & Thoday, J. M. (eds.) *Advances in Genetics*, vol. 11, 1–100 .

6. Nei, M. Modification of linkage intensity by natural selection. *Genetics* **57**, 625–641 .
7. Hartfield, M. & Keightley, P. D. Current hypotheses for the evolution of sex and recombination. *Integr. Zool.* **7**, 192–209 .
8. Felsenstein, J. The evolutionary advantage of recombination. *Genetics* **78**, 737–756 .
9. West, S. A., Lively, C. M. & Read, A. F. A pluralist approach to sex and recombination. *J. Evol. Biol.* .
10. Otto, S. P. & Barton, N. H. Selection for recombination in small populations. *Evolution* **55**, 1921–1931 .
11. Gerrish, P. J. & Lenski, R. E. The fate of competing beneficial mutations in an asexual population. *Genetica* **102-103**, 127–144 .
12. Otto, S. P. & Barton, N. H. The evolution of recombination: removing the limits to natural selection. *Genetics* **147**, 879–906 .
13. Barton, N. H. Linkage and the limits to natural selection. *Genetics* **140**, 821–841 .
14. Agrawal, A. F. Evolution of sex: Why do organisms shuffle their genotypes? *Curr. Biol.* **16**, R696–R704 .
15. Arjan, J. A. *et al.* Diminishing returns from mutation supply rate in asexual populations. *Science* **283**, 404–406 .
16. Kondrashov, A. S. Deleterious mutations and the evolution of sexual reproduction. *Nature* **336**, 435–440 .

17. Keightley, P. D. & Otto, S. P. Interference among deleterious mutations favours sex and recombination in finite populations. *Nature* **443**, 89–92 .
18. Fisher, R. A. *The genetical theory of natural selection* (Oxford Clarendon Press, 1930).
19. Muller, H. J. Some genetic aspects of sex. *Am. Nat.* **66**, 118–138 .
20. Felsenstein, J. & Yokoyama, S. The evolutionary advantage of recombination. II. individual selection for recombination. *Genetics* **83**, 845–859 .
21. Barton, N. H. A general model for the evolution of recombination. *Genet. Res.* **65**, 123–145 .
22. Barton, N. H. Genetic linkage and natural selection. *Philos. Trans. R. Soc. Lond. B Biol. Sci.* **365**, 2559–2569 .
23. Otto, S. P. & Feldman, M. W. Deleterious mutations, variable epistatic interactions, and the evolution of recombination. *Theor. Popul. Biol.* **51**, 134–147 .
24. Jaffe, K. Emergence and maintenance of sex among diploid organisms aided by assortative mating. *Acta Biotheor.* **48**, 137–147 .
25. Redfield. A truly pluralistic view of sex and recombination. *J. Evol. Biol.* **12**, 1043–1046 .
26. Yang, S. S. General distribution theory of the concomitants of order statistics. *Ann. Stat.* **5**, 996–1002 .
27. Martin, G., Otto, S. P. & Lenormand, T. Selection for recombination in structured populations. *Genetics* **172**, 593–609 .

28. Becks, L. & Agrawal, A. F. Higher rates of sex evolve in spatially heterogeneous environments. *Nature* **468**, 89–92 .
29. Hartfield, M., Otto, S. P. & Keightley, P. D. The maintenance of obligate sex in finite, structured populations subject to recurrent beneficial and deleterious mutation. *Evolution* **66**, 3658–3669 .
30. Whitlock, A. O. B., Azevedo, R. B. R. & Burch, C. L. Population structure promotes the evolution of costly sex in artificial gene networks. *Evolution* **73**, 1089–1100 .
31. Lenormand, T. & Otto, S. P. The evolution of recombination in a heterogeneous environment. *Genetics* **156**, 423–438 .
32. Trevors, J. T. Hypothesized origin of microbial life in a prebiotic gel and the transition to a living biofilm and microbial mats. *C. R. Biol.* **334**, 269–272 .
33. Flemming, H.-C. & Wuertz, S. Bacteria and archaea on earth and their abundance in biofilms. *Nat. Rev. Microbiol.* **17**, 247–260 .
34. Miller, S. L., Schopf, J. W. & Lazcano, A. Oparin’s “origin of life”: Sixty years later. *J. Mol. Evol.* **44**, 351–353 .
35. Kouyos, R. D., Otto, S. P. & Bonhoeffer, S. Effect of varying epistasis on the evolution of recombination. *Genetics* **173**, 589–597 .
36. Otto, S. P. & Michalakis, Y. The evolution of recombination in changing environments. *N. Jb. Geol. Paläont. Mh.* **486**, 516 .

37. Gandon, S. & Otto, S. P. The evolution of sex and recombination in response to abiotic or coevolutionary fluctuations in epistasis. *Genetics* **175**, 1835–1853 .
38. Peters, A. D. & Lively, C. M. The red queen and fluctuating epistasis: A population genetic analysis of antagonistic coevolution. *Am. Nat.* **154**, 393–405 .
39. Neher, R. A. & Shraiman, B. I. Competition between recombination and epistasis can cause a transition from allele to genotype selection. *Proc. Natl. Acad. Sci. U. S. A.* **106**, 6866–6871 .
40. Neher, R. A., Kessinger, T. A. & Shraiman, B. I. Coalescence and genetic diversity in sexual populations under selection. *Proc. Natl. Acad. Sci. U. S. A.* **110**, 15836–15841 .
41. Kosheleva, K. & Desai, M. M. Recombination alters the dynamics of adaptation on standing variation in laboratory yeast populations. *Mol. Biol. Evol.* **35**, 180–201 .
42. Barton, N. H. & Otto, S. P. Evolution of recombination due to random drift. *Genetics* **169**, 2353–2370 .
43. Miller, J. B. & Sanjurjo, A. A bridge from monty hall to the hot hand: The principle of restricted choice. *J. Econ. Perspect.* **33**, 144–162 .
44. Berkson, J. Limitations of the application of fourfold table analysis to hospital data. *Biometrics* **2**, 47–53 .
45. Joag-Dev, K. & Proschan, F. Negative association of random variables with applications. *Ann. Statist.* **11**, 286–295 .

**Acknowledgements** The authors thank S. Otto and N. Barton for helpful conversations in the early stages of this work. Special thanks go to E. Baake for her thoughts on later stages of this work and help with some key mathematical aspects. Much of this work was performed during a CNRS-funded visit (P.G.) to the Laboratoire Jean Kuntzmann, University of Grenoble Alpes, France, and during a visit to Bielefeld University (P.G.) funded by Deutsche Forschungsgemeinschaft (German Research Foundation, DFG) via Priority Programme SPP 1590 Probabilistic Structures in Evolution, grants BA 2469/5-2 and WA 967/4-2. The authors thank J. Streelman, R. Rosenzweig and the Biology Department at Georgia Institute of Technology for critical infrastructure and computational support. P.G. and A.C. received financial support from the USA/Brazil Fulbright scholar program. P.G. and P.S. received financial support from National Aeronautics and Space Administration grant NNA15BB04A.

**Author contributions** P.G. conceived the theory conceptually; P.G., P.S., B.S. and A.C. developed the theory verbally and with simulation; P.G, B.Y. and J.C. developed the theory mathematically; B.Y. and J.C. provided mathematical proofs for the across-population part; P.G., V.V., F.C. and N.H. provided mathematical proofs for the within-population part. P.G. wrote the paper with critical help and guidance from B.S., P.S. and B.Y.

**Competing interests** The authors declare no competing interests.

**Additional information**

**Supplementary information** is available for this paper at <https://doi.org/10.1038/s....>

**Correspondence and requests for materials** should be addressed to P.G.

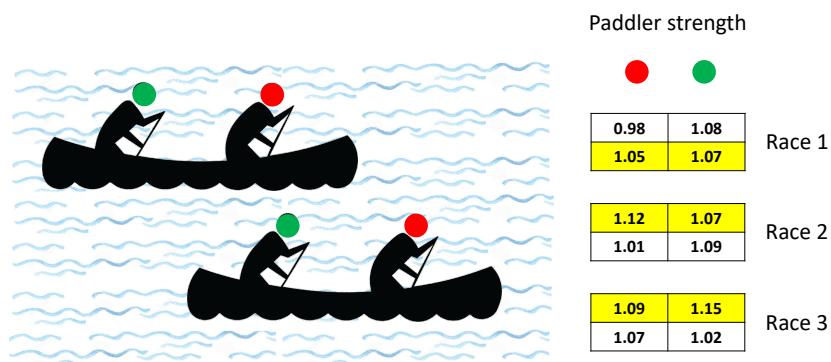

**Fig 1 | Canoe race analogy.** Each canoe contains two paddlers. The strength of each paddler is measured and reported in the table. In any given canoe race, there is no correlation between paddler strengths  $A$  and  $B$ . In each race, paddler strengths are recorded (tables on right), and the winning canoe is that in which the sum of the strengths of the two paddlers is the greatest (highlighted). Three such canoe races are conducted. We ask: what is the covariance between the strengths of paddlers  $A$  and  $B$  among winning canoes only? While it seems reasonable to suppose that winning canoes would carry two strong paddlers thereby resulting in positive covariance, the counter-intuitive answer we find is that the covariance is, for all practical purposes, unconditionally negative. By analogy, paddlers are genes, paddler strength is genic fitness, and canoes are genotypes. Natural selection picks the winner.



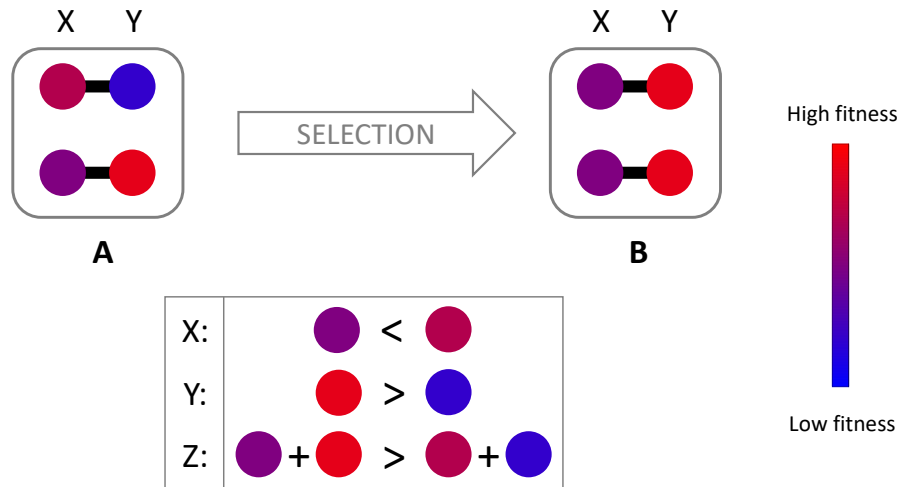

**Fig 2 | Two loci, two alleles.** Here, a large (infinite) population consists of individuals whose genome has only two loci  $x$  and  $y$ , each of which carries one of two alleles: genotype 1 encodes quantified phenotype  $X_1$  at the  $x$  locus and  $Y_1$  at the  $y$  locus, and genotype 2 carries quantified phenotype  $X_2$  at the  $x$  locus and  $Y_2$  at the  $y$  locus. Fitness is indicated by color. An individual's fitness is a function of the two phenotypes:  $Z = \phi(X, Y)$ ; here we make the simplifying assumption that  $\phi(X, Y) = X + Y$ , so that the fitnesses of genotypes 1 and 2 are  $Z_1 = X_1 + Y_1$  and  $Z_2 = X_2 + Y_2$ , respectively. The fitter of these two genotypes has total fitness denoted  $Z^{[2]}$  (i.e.,  $Z^{[2]} = \text{Max}\{Z_1, Z_2\}$ ) and genic fitnesses  $X_{(2)}$  and  $Y_{(2)}$  (i.e.,  $Z^{[2]} = X_{(2)} + Y_{(2)}$ ). Similarly, the less-fit of these two genotypes has total fitness  $Z^{[1]} = X_{(1)} + Y_{(1)}$ . We note:  $Z^{[2]} > Z^{[1]}$  by definition, but this does *not* guarantee that  $X_{(2)} > X_{(1)}$  or that  $Y_{(2)} > Y_{(1)}$ , as illustrated in the lower box. The population labeled *A* consists of two distinct genotypes but selection acts to remove the inferior genotype leaving a homogeneous population in which individuals are all genetically identical (with fitness  $Z^{[2]}$ ) as illustrated in the population labeled *B*.

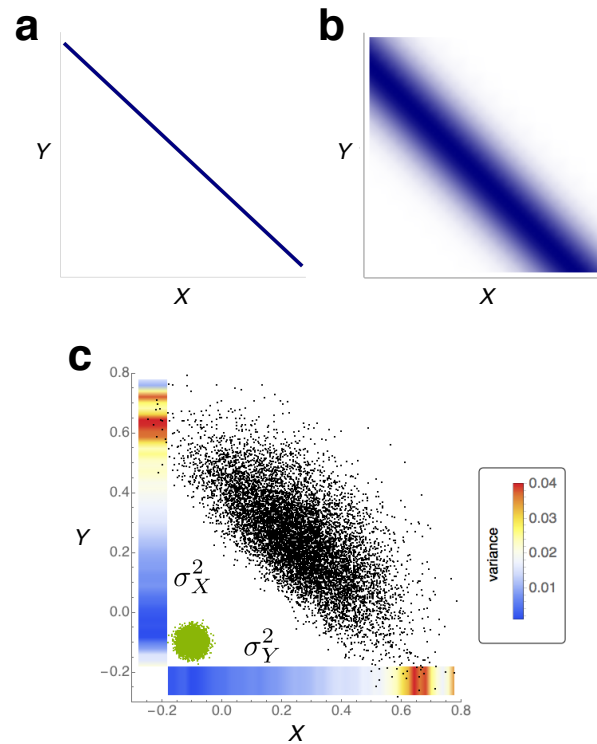

**Fig 3 | Natural selection promotes negative associations.** In the absence of recombination, selection does not act independently on  $X$  and  $Y$  but organismal fitness which, for simplicity, we here assume to be their sum,  $Z = \phi(X, Y) = X + Y$ . Perhaps counterintuitively, this fact alone creates negative associations. As discussed in the main text, this fact gives rise to a correlation of exactly negative one when the sum is a constant (a) and something intuitively negative when the sum is distributed as expected (b), i.e., as an order statistic. c, Ten thousand simulated populations move from their initial (green dots) to final (black dots) mean fitnesses. Here, the predicted negative covariance in the final state is apparent. The heatmap bars indicate variance in  $Y$  along the  $x$ -axis and variance in  $X$  along the  $y$ -axis, a manifestation of Hill-Robertson interference.

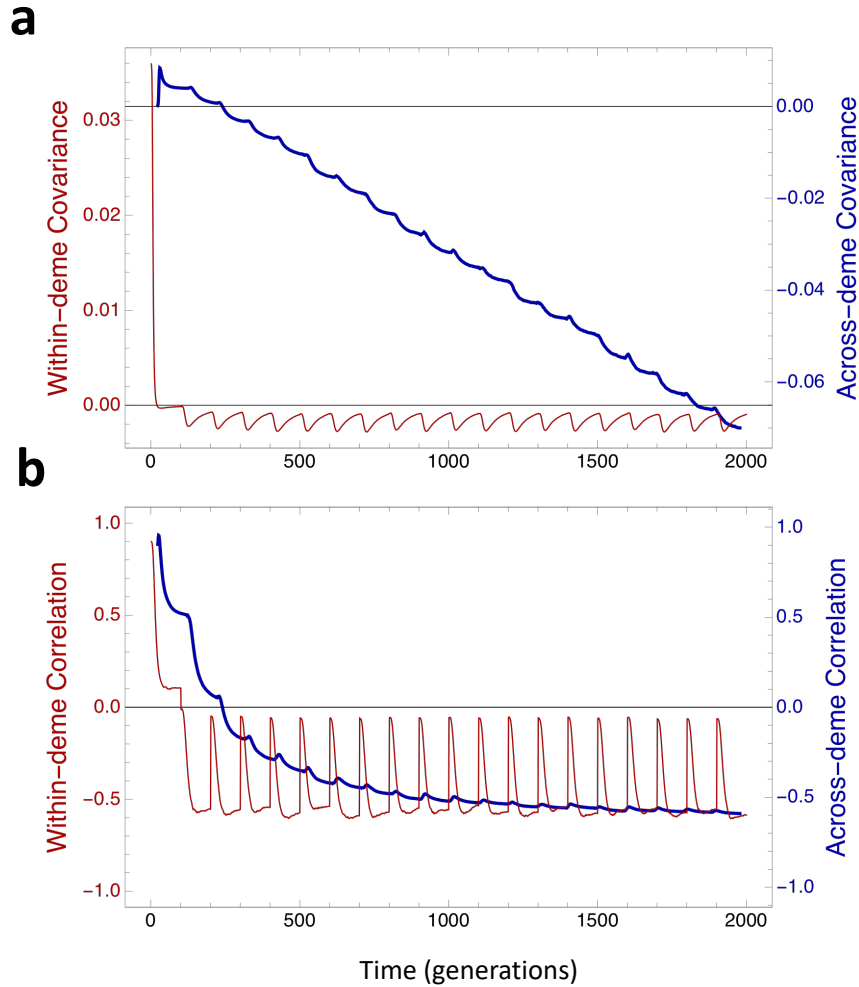

**Fig 4 | Covariance dynamics in a metapopulation.** Simulated metapopulations of size  $N = 500$  begin with all individuals being assigned unique genic fitness pairs,  $(X, Y)$ , drawn at random from a common bivariate normal distribution with correlation coefficient 0.9, means  $-0.1$  and variances 0.2. Every 100 generations, uncorrelated gaussian noise was injected as follows:  $X' = X + Q$  and  $Y' = Y + Q$ , where  $Q \sim \mathcal{N}(-.1, .1)$ . Plotted is mean covariance (**a**) and mean correlation (**b**) of 2000 runs.
